# Supplementary material for: End-of-life treatment preference discussions between older people and their physician before and during the COVID-19 pandemic: cross sectional and longitudinal analyses from the Longitudinal Aging Study Amsterdam
Source: PubMed Central journal article supplement (PMC10355077; doi:10.1186/s12877-023-04140-5), 2023-07-18
Supplement: 12877_2023_4140_MOESM1_ESM.pdf [file 12877_2023_4140_MOESM1_ESM.pdf]

Additional File 1

Table A1. One or more ACP topics; never thought about it, thought about it, discussed with a physician during COVID-19 (n=428) \*

|                                                                      | Never thought about it<br>(n=101)<br>n (%) | Thought about it, but<br>never discussed it with<br>physician<br>(n=240)<br>n (%) | Discussed it with<br>physician<br>(n=87)<br>n (%) |
|----------------------------------------------------------------------|--------------------------------------------|-----------------------------------------------------------------------------------|---------------------------------------------------|
| Education level                                                      |                                            |                                                                                   |                                                   |
| <i>Low</i>                                                           | 47 (46.5)                                  | 82 (34.2)                                                                         | 32 (36.8)                                         |
| <i>Middle</i>                                                        | 34 (33.7)                                  | 94 (39.2)                                                                         | 32 (36.81)                                        |
| <i>High</i>                                                          | 20 (19.8)                                  | 64 (26.7)                                                                         | 23 (26.4)                                         |
| <b>Having a partner, no</b>                                          | <b>28 (27.7)</b>                           | <b>97 (40.4)</b>                                                                  | <b>46 (52.9)</b>                                  |
| <b>Living in residential home (vs home)</b>                          | <b>0 (0)</b>                               | <b>2 (0.6)</b>                                                                    | <b>4 (5.1)</b>                                    |
| <b>Depressive symptoms</b>                                           | <b>0 (0)</b>                               | <b>8 (3.3)</b>                                                                    | <b>6 (6.9)</b>                                    |
| <b>Anxiety symptoms</b>                                              | <b>4 (4.0)</b>                             | <b>32 (13.5)</b>                                                                  | <b>13 (14.9)</b>                                  |
| <b>Mastery [mean (SD)]</b>                                           | <b>26.11 (4.44)</b>                        | <b>24.48 (4.43)</b>                                                               | <b>23.53 (4.94)</b>                               |
| <b>Number of activities with some difficulty or worse (out of 7)</b> |                                            |                                                                                   |                                                   |
| <b><i>0 activities</i></b>                                           | <b>46 (48.9)</b>                           | <b>80 (36.7)</b>                                                                  | <b>13 (15.7)</b>                                  |
| <b><i>1 activity</i></b>                                             | <b>23 (24.5)</b>                           | <b>52 (23.9)</b>                                                                  | <b>19 (22.9)</b>                                  |
| <b><i>≥2 activities</i></b>                                          | <b>25 (26.6)</b>                           | <b>86 (39.4)</b>                                                                  | <b>51 (61.4)</b>                                  |
| Less than good/excellent self-perceived health (vs good/excellent)   | 21 (24.1)                                  | 71 (32.4)                                                                         | 27 (35.5)                                         |
| Loneliness, no                                                       | 46 (46.9)                                  | 91 (38.7)                                                                         | 41 (47.7)                                         |
| Having been in quarantine                                            | 7 (7.4)                                    | 33 (14.7)                                                                         | 12 (14.3)                                         |
| Not having been ill during the COVID-19 crisis                       | 85 (89.5)                                  | 201 (86.6)                                                                        | 74 (89.2)                                         |
| Knowing someone who tested positive on COVID-19, mentioned           | 27 (26.7)                                  | 64 (26.7)                                                                         | 24 (27.6)                                         |

|                                                                     |                  |                   |                  |
|---------------------------------------------------------------------|------------------|-------------------|------------------|
| Knowing someone who was hospitalized for COVID-19, <i>mentioned</i> | 18 (17.8)        | 58 (24.2)         | 13 (14.9)        |
| <b>Knowing someone who died from COVID-19, <i>mentioned</i></b>     | <b>17 (16.8)</b> | <b>66 (27.5)</b>  | <b>12 (13.8)</b> |
| <b>Discussed ACP with someone other than a physician</b>            | <b>N.A.</b>      | <b>125 (59.0)</b> | <b>71 (86.6)</b> |

\* missing n=11; bold highlights p<0.05 in chi-squared test or Anova (mastery); SD = standard

deviation; N.A. = not applicable.
